# Supplementary material for: Multivalent Epigraph Hemagglutinin Vaccine Protects against Influenza B Virus in Mice
Source: MDPI journal article supplement (doi:10.3390/pathogens13020097), 2024-01-23
Supplement: s1 [file s1]

**A**

| Ad-HA     | VP/mL   | IFU/mL  | VP:IFU Ratio |
|-----------|---------|---------|--------------|
| Vic-Epi 1 | 1.26e12 | 2.27e10 | 56:1         |
| Vic-Epi 2 | 7.95e11 | 4.13e9  | 192:1        |
| Vic-Epi 3 | 1.18e12 | 5.59e9  | 211:1        |
| Yam-Epi 1 | 1.12e12 | 4.08e9  | 274:1        |
| Yam-Epi 2 | 6.25e11 | 1.58e9  | 395:1        |
| Yam-Epi 3 | 7.55e11 | 3.48e9  | 217:1        |

**B**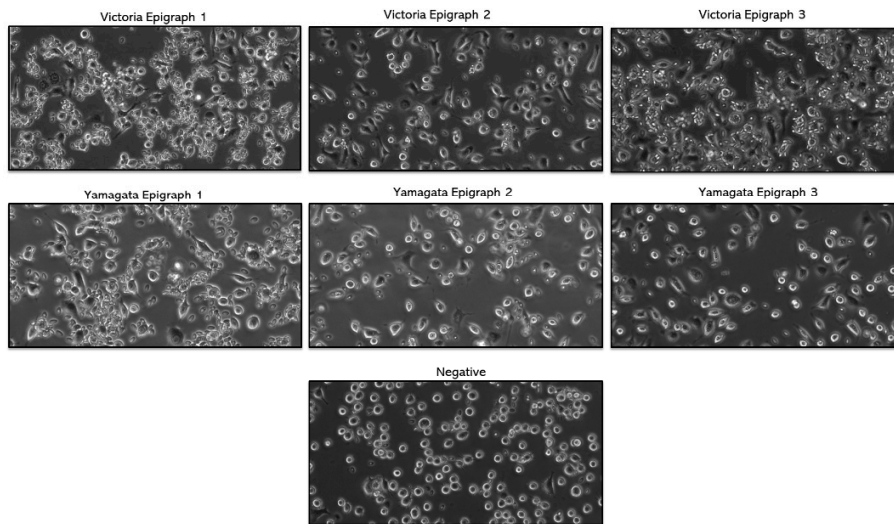**C**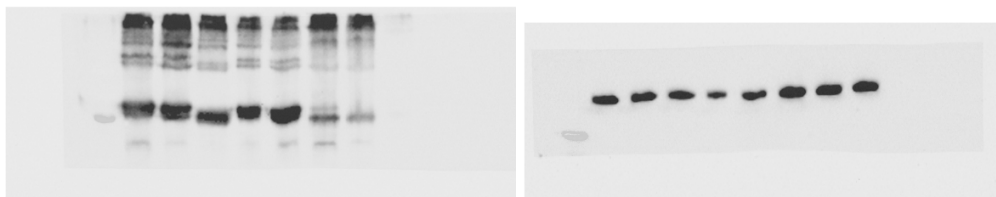

**Supplemental Figure 1. Characterization of IBV Epigraph HA proteins.** (A) Infectious unit to viral particle ratio determined by AdenoX Rapid Titer. (B) Rosette Analysis for Epigraph HA proteins. (C) Full western blot analysis of Epigraph HA proteins (Lane 1: ladder; lane 2: Victoria Epigraph 1; lane 3: Victoria Epigraph 2; lane 4: Victoria Epigraph 3; lane 5: mis-pipette; lane 6: Yamagata Epigraph 1; lane 7: Yamagata Epigraph 2; lane 8: Yamagata Epigraph 3; lane 9: uninfected control).

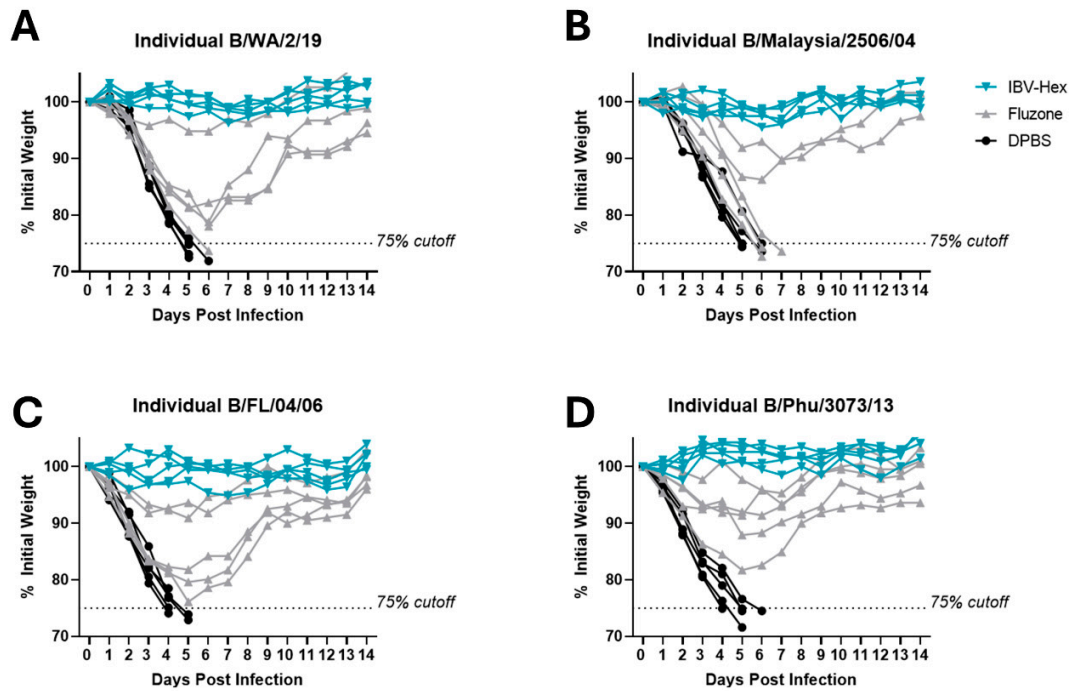

**Supplemental Figure 2. Weight loss of individual mice after lethal challenge.** Mice were challenged with 100MLD<sub>50</sub> of Victoria-like IBV (A) B/WA/2/19 and (B) B/Malaysia/2506/04 or Yamagata-like IBV (C) B/FL/04/06 and (D) B/Phu/3073/2013.
